# Supplementary material for: New Chemicals Suppressing SARS-CoV-2 Replication in Cell Culture
Source: MDPI journal article supplement (doi:10.3390/molecules27175732), 2022-09-05

# New Chemicals Suppressing SARS-CoV-2 Replication in Cell Culture

Alexey Sulimov <sup>1,2</sup>, Ivan Ilin <sup>1,2</sup>, Danil Kutov <sup>1,2,\*</sup>, Khidmet Shikhaliev <sup>3</sup>, Dmitriy Shcherbakov <sup>4</sup>, Oleg Pyankov <sup>4</sup>, Nadezhda Stolpovskaya <sup>3</sup>, Svetlana Medvedeva <sup>3</sup> and Vladimir Sulimov <sup>1,2,\*</sup>

<sup>1</sup> Dimonta Ltd., 15 Nagornaya Str., Bldg 8, 117186 Moscow, Russia

<sup>2</sup> Research Computing Center, Lomonosov Moscow State University, Leninskie Gory, 1, Building 4, 119234 Moscow, Russia

<sup>3</sup> Department of Organic Chemistry, Faculty of Chemistry, Voronezh State University, 1 Universitetskaya Sq., 394018 Voronezh, Russia

<sup>4</sup> State Research Centre of Virology and Biotechnology “Vector”, 630559 Koltsovo, Russia

\* Correspondence: dk@dimonta.com (D.K.); vladimir.sulimov@gmail.com (V.S.)

## Contents:

|                      |    |
|----------------------|----|
| 1. NMR Spectra ..... | S2 |
|----------------------|----|

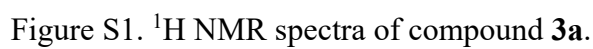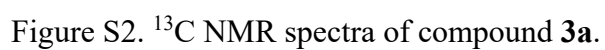

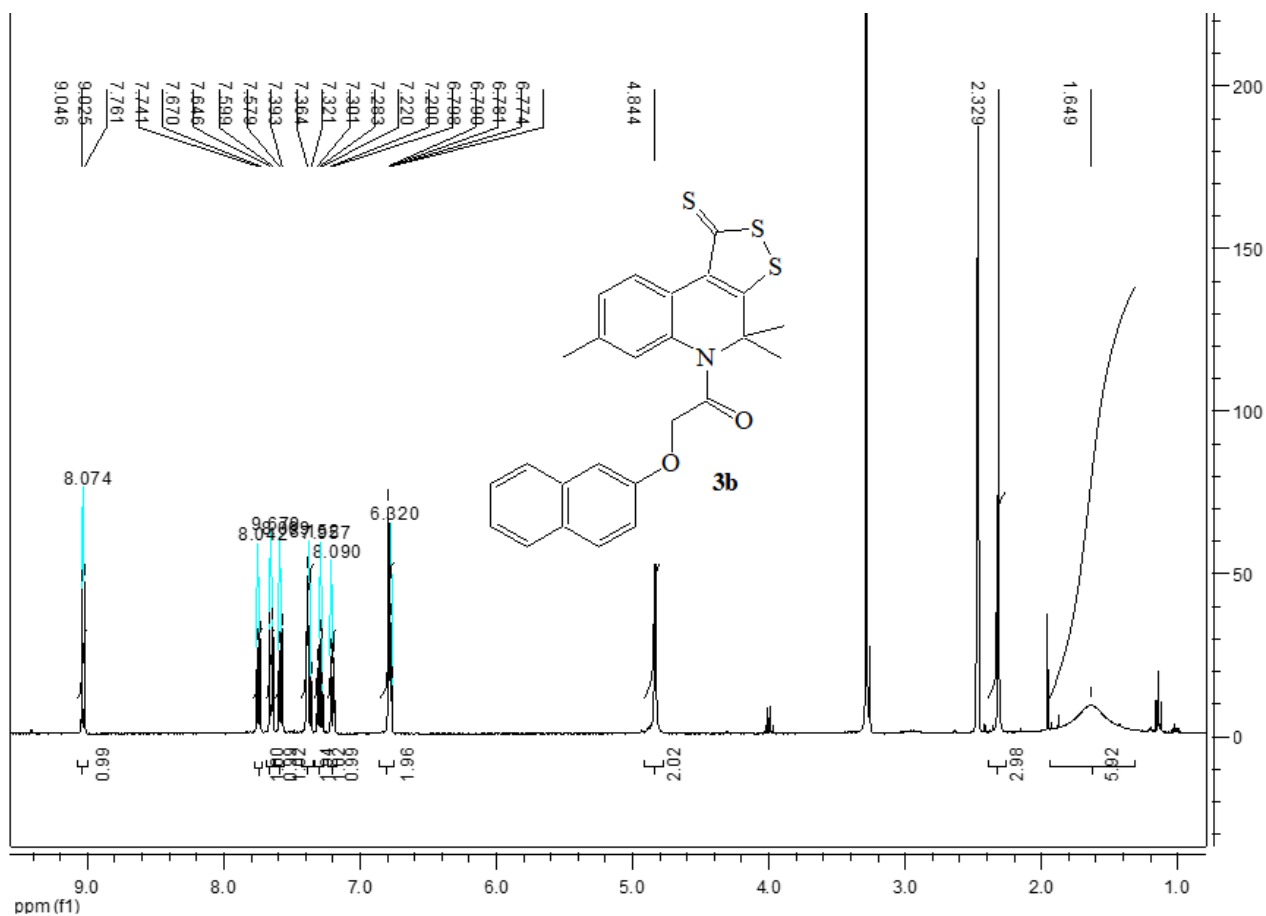Figure S3. <sup>1</sup>H NMR spectra of compound **3b**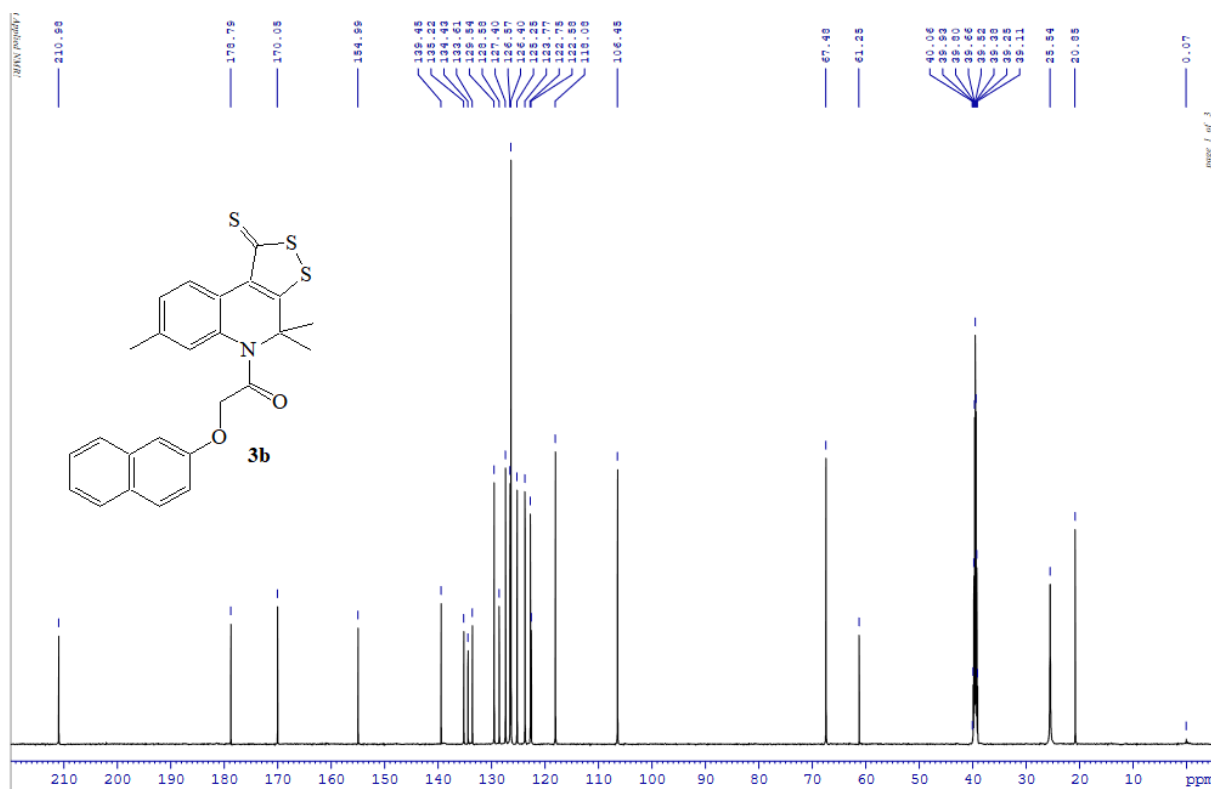Figure S4. <sup>13</sup>C NMR spectra of compound **3b**

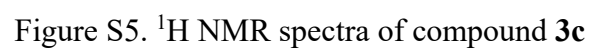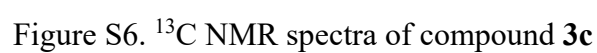

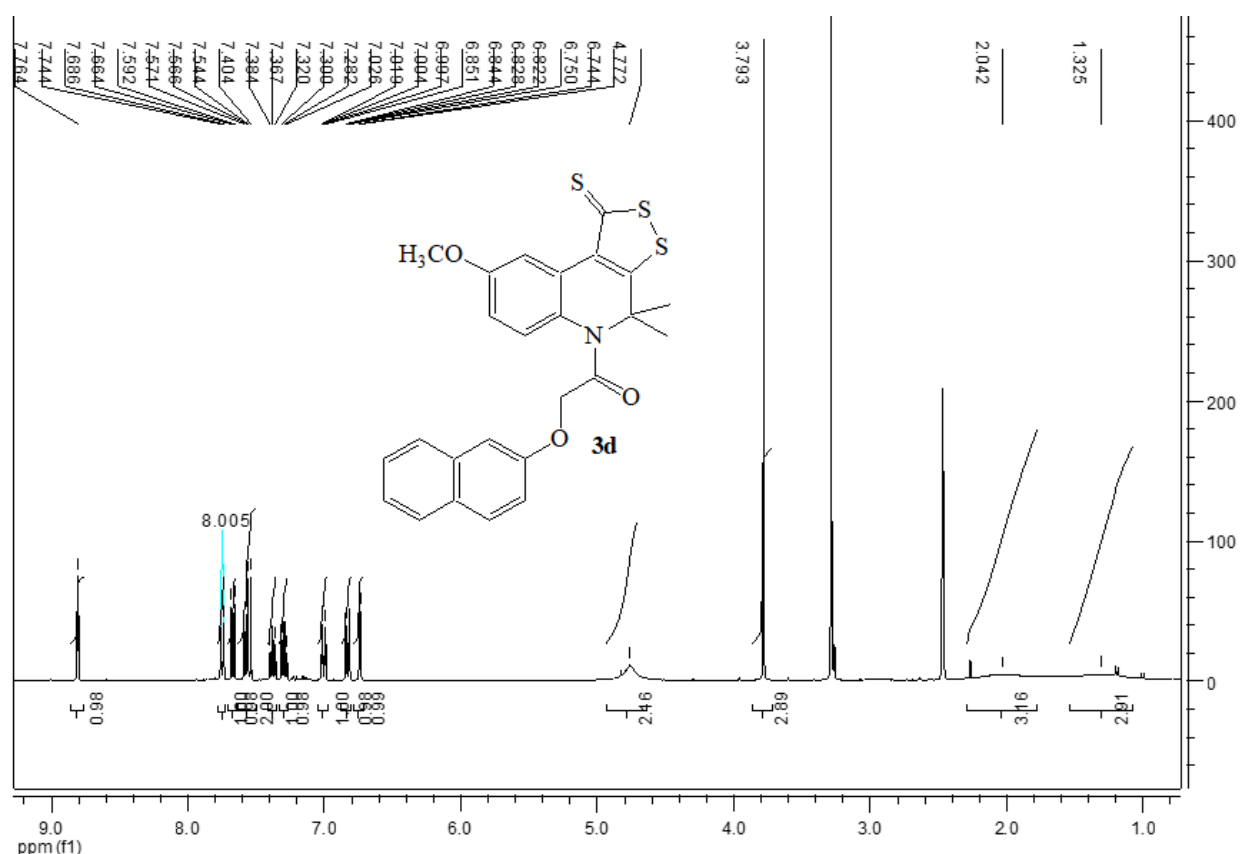Figure S7. <sup>1</sup>H NMR spectra of compound **3d**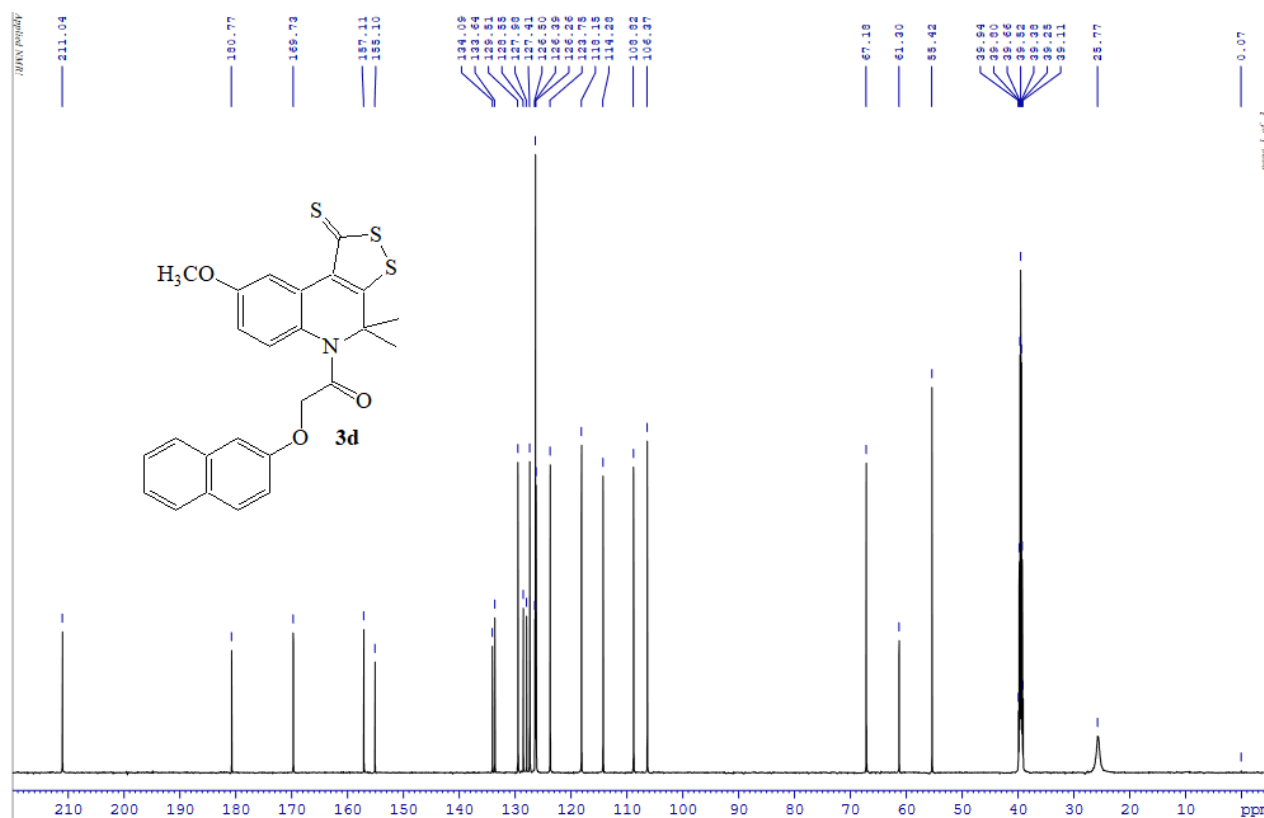

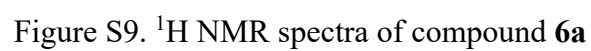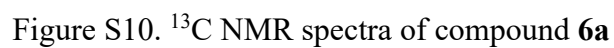

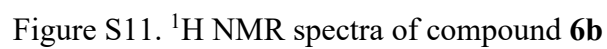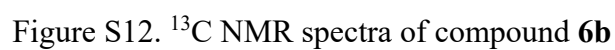

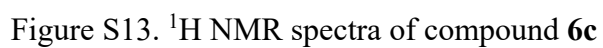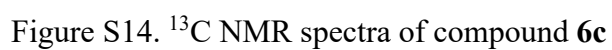



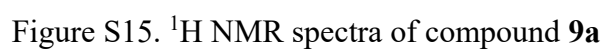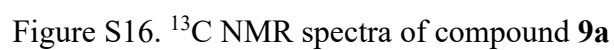

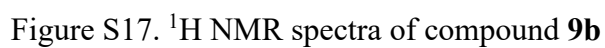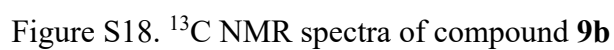

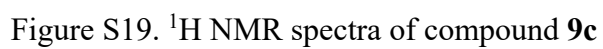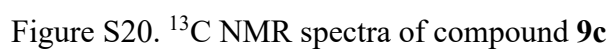

Supplement: s1 [file s1]
